# Supplementary material for: Self-assembly properties of zinc(ii) complexes with azo ligands grafted with dodecyl chains: towards supramolecular materials driven by coordination and hydrophobic effect
Source: Royal Society of Chemistry journal article supplement (doi:10.1039/d4ce00983e), 2024-01-01
Supplement: d4ce00983e1.pdf [file d4ce00983e1.pdf]

**Electronic Supporting Information**

**Self-assembly properties of zinc(II) complexes with azo ligands grafted with the dodecyl chains: towards supramolecular materials driven by coordination and hydrophobic effect**

Kristina Gak Simić,<sup>a</sup> Ivana Đorđević,<sup>\*b</sup> Aleksandra Mašulović,<sup>a</sup> Lidija Radovanović,<sup>a</sup>  
Olivier Jeannin,<sup>c</sup> Franck Camerel<sup>c</sup> and Nemanja Trišović<sup>d</sup>

<sup>a</sup> Innovation Centre of the Faculty of Technology and Metallurgy, Karnegijeva 4, 11120 Belgrade, Serbia.

<sup>b</sup> University of Belgrade - Institute of Chemistry, Technology and Metallurgy - National Institute of the Republic of Serbia, Njegoševa 12, 11001 Belgrade, Serbia. E-mail: ivana.djordjevic@ihm.bg.ac.rs

<sup>c</sup> Institut des Sciences Chimiques de Rennes, CNRS UMR 6226, Université de Rennes, Rennes, France.

<sup>d</sup> University of Belgrade, Faculty of Technology and Metallurgy, Karnegijeva 4, 11120 Belgrade, Serbia.

**Table S1** Crystal and structure refinement data for **1** and **2**.

| Compound                                                      | <b>1</b>                                                          | <b>2</b>                                                                       |
|---------------------------------------------------------------|-------------------------------------------------------------------|--------------------------------------------------------------------------------|
| Formula                                                       | C <sub>44</sub> H <sub>64</sub> N <sub>10</sub> O <sub>8</sub> Zn | C <sub>58</sub> H <sub>84</sub> N <sub>6</sub> O <sub>14</sub> Zn <sub>3</sub> |
| Formula weight, g mol <sup>-1</sup>                           | 926.44                                                            | 1285.48                                                                        |
| Crystal size, mm <sup>3</sup>                                 | 0.26 × 0.25 × 0.10                                                | 0.12 × 0.09 × 0.05                                                             |
| Crystal system                                                | Monoclinic                                                        | Triclinic                                                                      |
| Space group                                                   | <i>C2/c</i>                                                       | <i>p</i> $\bar{1}$ <i>1</i>                                                    |
| <i>a</i> , Å                                                  | 15.459(2)                                                         | 9.8122(12)                                                                     |
| <i>b</i> , Å                                                  | 10.6509(13)                                                       | 10.5321(13)                                                                    |
| <i>c</i> , Å                                                  | 30.001(4)                                                         | 14.9799(17)                                                                    |
| $\alpha$ , °                                                  | -                                                                 | 87.605(4)                                                                      |
| $\beta$ , °                                                   | 103.017(6)                                                        | 87.231(4)                                                                      |
| $\gamma$ , °                                                  | -                                                                 | 86.746(4)                                                                      |
| <i>V</i> , Å <sup>3</sup>                                     | 4812.8(11)                                                        | 1542.6(3)                                                                      |
| <i>Z</i>                                                      | 4                                                                 | 1                                                                              |
| <i>F</i> (000)                                                | 1968                                                              | 676                                                                            |
| $\mu$ , mm <sup>-1</sup>                                      | 0.57                                                              | 1.223                                                                          |
| $\rho_c$ , g cm <sup>-3</sup>                                 | 1.279                                                             | 1.384                                                                          |
| <i>T</i> , K                                                  | 295(2)                                                            | 150(2)                                                                         |
| $\vartheta$ range, °                                          | 2.35–27.18                                                        | 2.33–27.02                                                                     |
| Index ranges,                                                 | -20→20                                                            | -12→12                                                                         |
| <i>h</i> , <i>k</i> , <i>l</i>                                | -13→13                                                            | -13→13                                                                         |
|                                                               | -38→38                                                            | -18→19                                                                         |
| Reflections collected/unique                                  | 30275/5492                                                        | 23386/7060                                                                     |
| Data/restraints/parameters                                    | 4483/0/285                                                        | 5577/0/371                                                                     |
| <i>R</i> indices [ <i>I</i> > 2σ( <i>I</i> )]                 | <i>R</i> = 0.062, <i>R</i> <sub>w</sub> = 0.1695*                 | <i>R</i> = 0.0343, <i>R</i> <sub>w</sub> = 0.864**                             |
| <i>R</i> indices (all data)                                   | <i>R</i> = 0.0751, <i>R</i> <sub>w</sub> = 0.1788                 | <i>R</i> = 0.0506, <i>R</i> <sub>w</sub> = 0.096                               |
| Goodness-of-fit                                               | 1.088                                                             | 0.948                                                                          |
| <i>R</i> <sub>int</sub>                                       | 0.0646                                                            | 0.0488                                                                         |
| $\Delta\rho_{\max}$ , $\Delta\rho_{\min}$ , e Å <sup>-3</sup> | 0.7, -0.467                                                       | 0.4, -0.44                                                                     |

$$*w = 1 / [\sigma^2(F_o^2) + (0.0856 \cdot P)^2 + 5.3972 \cdot P] \text{ where } P = (F_o^2 + 2 \cdot F_c^2) / 3.$$

$$**w = 1 / [\sigma^2(F_o^2) + (0.0600 \cdot P)^2] \text{ where } P = (F_o^2 + 2 \cdot F_c^2) / 3.$$

**Table S2** Selected bond lengths (Å) and angles (°) for complexes **1** and **2**

| Complex 1           |            |                     |           |
|---------------------|------------|---------------------|-----------|
| Bond                |            | Angle               |           |
| Zn(1)–O(2), O(2_a)  | 2.0327(3)  | O(2)–Zn(1)–N(1_a),  | 90.12(1)  |
| Zn(1)–N(1), N(1_a)  | 2.0646(3)  | N(1)–Zn(1)–O(2_a)   |           |
| Zn(1)–N(4), N(4_a)  | 2.4923(3)  | O(2)–Zn(1)–N(4_a),  | 152.70(1) |
| Angle               |            | N(4)–Zn(1)–O(2_a)   |           |
| O(2)–Zn(1)–N(1),    |            | N(1)–Zn(1)–N(4),    | 68.58(1)  |
| O(2_a)–Zn(1)–N(1_a) | 105.15(1)  | N(1_a)–Zn(1)–N(4_a) |           |
| O(2)–Zn(1)–N(4),    |            | N(1)–Zn(1)–N(4_a),  | 88.76(1)  |
| O(2_a)–Zn(1)–N(4_a) | 88.27(1)   | N(4)–Zn(1)–N(1_a)   |           |
| O(2)–Zn(1)–O(2_a)   | 114.54(1)  | N(1)–Zn(1)–N(1_a)   | 151.80(1) |
|                     |            | N(4)–Zn(1)–N(4_a)   | 74.89(1)  |
| Complex 2           |            |                     |           |
| Bond                |            | Angle               |           |
| Zn(1)–O(1)          | 2.0023(17) | O(4)–Zn(1)–N(1)     | 147.79(6) |
| Zn(1)–O(3)          | 2.4600(17) | O(4)–Zn(1)–N(3)     | 93.23(6)  |
| Zn(1)–O(4)          | 2.0211(15) | O(5)–Zn(1)–N(1)     | 102.46(7) |
| Zn(1)–O(5)          | 1.9805(16) | O(5)–Zn(1)–N(3)     | 88.49(6)  |
| Zn(1)–N(1)          | 2.0813(18) | N(1)–Zn(1)–N(3)     | 71.90(7)  |
| Zn(1)–N(3)          | 2.3486(18) | O(2)–Zn(2)–O(4),    | 91.18(6)  |
| Zn(2)–O(2), O(2_a)  | 2.1201(15) | O(2_a)–Zn(2)–O(4_a) |           |
| Zn(2)–O(4), O(4_a)  | 2.0936(14) | O(2)–Zn(2)–O(6),    | 91.55(6)  |
| Zn(2)–O(6), O(6_a)  | 2.0846(15) | O(2_a)–Zn(2)–O(6_a) |           |
| Angle               |            | O(2)–Zn(2)–O(2_a),  |           |
| O(1)–Zn(1)–O(3)     | 95.03(6)   | O(4)–Zn(2)–O(4_a),  | 180.00    |
| O(1)–Zn(1)–O(4)     | 97.39(6)   | O(6)–Zn(2)–O(6_a)   |           |
| O(1)–Zn(1)–O(5)     | 101.24(7)  | O(2)–Zn(2)–O(4_a),  | 88.82(6)  |
| O(1)–Zn(1)–N(1)     | 92.31(7)   | O(4)–Zn(2)–O(2_a)   |           |
| O(1)–Zn(1)–N(3)     | 163.05(6)  | O(2)–Zn(2)–O(6_a),  | 88.45(6)  |
| O(3)–Zn(1)–O(4)     | 57.31(5)   | O(6)–Zn(2)–O(2_a)   |           |
| O(3)–Zn(1)–O(5)     | 158.08(6)  | O(4)–Zn(2)–O(6),    | 88.94(6)  |
| O(3)–Zn(1)–N(1)     | 91.37(6)   | O(4_a)–Zn(2)–O(6_a) |           |
| O(3)–Zn(1)–N(3)     | 79.64(6)   | O(4)–Zn(2)–O(6_a),  | 91.06(6)  |
| O(4)–Zn(1)–O(5)     | 105.61(6)  | O(6)–Zn(2)–O(4_a)   |           |

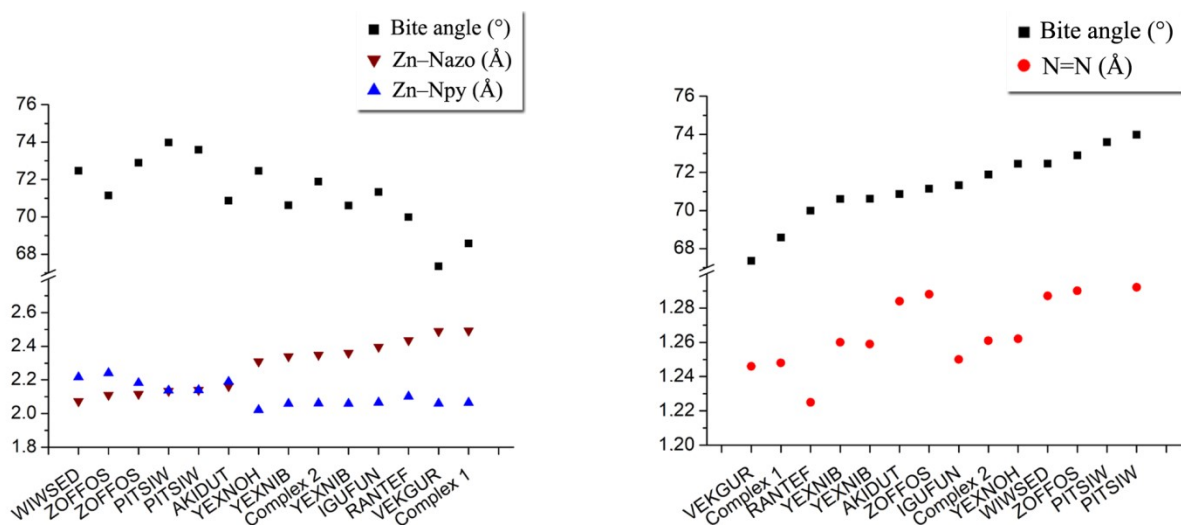

**Fig. S1** Evolution of the bite angle with the Zn–N distances (left) and evolution of the N=N distance with the bite angle (right) in Zn azpm and Zn azpy complexes from the CCDC structures.

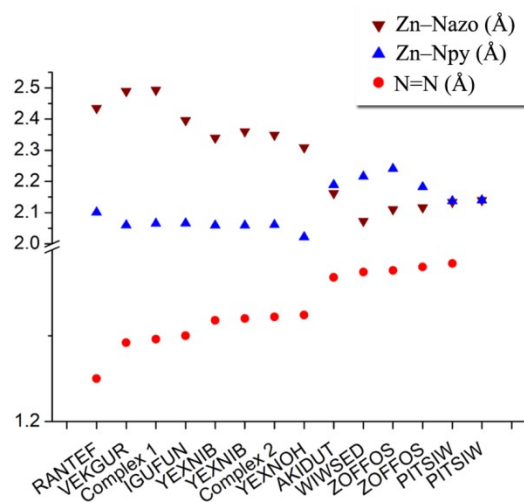

**Fig. S2** Evolution of the N=N distance with the Zn–Nazo and Zn–Npy distances in Zn azpm and Zn azpy complexes from the CCDC structures.

**Table S3** Selected bond lengths (Å) of optimized complex **1** geometries at different levels of theory compared to crystal structure data as referent values<sup>a</sup>

|    | Level of theory                                                                         | Zn(1)–O(2)          | Zn(1)–N(1)          | Zn(1)–N(4)          |
|----|-----------------------------------------------------------------------------------------|---------------------|---------------------|---------------------|
|    | Bond                                                                                    | 2.0327 <sup>a</sup> | 2.0646 <sup>a</sup> | 2.4923 <sup>a</sup> |
| 1  | PBE1PBE / 6-31G                                                                         | 2.0139              | 2.0991              | 2.4487              |
| 2  | PBE1PBE / 6-311G                                                                        | 2.0453*             | 2.1140*             | 2.2778*             |
| 3  | PBE1PBE / def2TZVP                                                                      | 2.0085              | 2.1455              | 2.5808              |
| 4  | B3LYP / 6-31G                                                                           | 2.0205              | 2.1187              | 2.4992              |
| 5  | B3LYP / 6-311G                                                                          | 2.0555*             | 2.1265*             | 2.3292*             |
| 6  | B3LYP / lanl2dz                                                                         | 2.0701*             | 2.1717*             | 2.3889*             |
| 7  | B3LYP /<br>6-31G(d,p) for C, O, N, H<br>LanL2DZ for Zn                                  | 2.1366*             | 2.2508*             | 2.7967*             |
| 8  | B3LYP /<br>6-31+G(d,p) for O<br>6-31G(d) for C, N<br>6-31G for H<br>6-311+G(d,p) for Zn | 2.0240              | 2.1387*             | 2.5254*             |
| 9  | B3LYP /<br>6-31+G(d,p) for O, N<br>6-31G(d) for C<br>6-31G for H<br>6-311+G(d,p) for Zn | 2.0199              | 2.1544              | 2.6093              |
| 10 | B3PW91 / 6-311G(d,p)                                                                    | 2.0016              | 2.1283              | 2.4203              |
| 11 | BVP86 / 6-31G                                                                           | 2.0254*             | 2.1058*             | 2.4579*             |
| 12 | TPSSTPSS / 6-31G                                                                        | 2.0172              | 2.0990              | 2.4419*             |
| 13 | WB97XD / 6-31G                                                                          | 2.0080*             | 2.1052*             | 2.4517*             |
| 14 | mPW1PW91 / 6-31G                                                                        | 2.0102              | 2.0976              | 2.4530              |
| 15 | LC-wPBE / 6-31G                                                                         | 1.9955              | 2.0824              | 2.4407              |
| 16 | LC-wPBE / 6-311G(d,p)                                                                   | 1.9853              | 2.1139              | 2.3907              |
| 17 | M06-2X / 6-31G                                                                          | 2.0606*             | 2.1295*             | 2.4383*             |
| 18 | CAM-B3LYP / 6-31G                                                                       | 2.0033*             | 2.0980*             | 2.4545*             |
| 19 | CAM-B3LYP / 6-311G                                                                      | 2.0352              | 2.1115              | 2.2890*             |
| 20 | CAM-B3LYP / 6-311G(d,p)                                                                 | 1.9902              | 2.1246              | 2.4144              |

\* average value

**Table S4** Selected angles (°) of optimized complex **1** geometries at different levels of theory compared to crystal structure data as referent values<sup>a</sup>

| Angle                       |              | MPW1PW91            | B3LYP  | BVP86  | TPSSTPSS | CAM-B3LYP   |        |
|-----------------------------|--------------|---------------------|--------|--------|----------|-------------|--------|
| Level of theory             |              | 6-31G               | 6-31G  | 6-31G  | 6-31G    | 6-311G(d,p) |        |
| N1–Zn1–N4,<br>N1_a–Zn1–N4_a | <i>cis</i>   | 68.58 <sup>a</sup>  | 69.12  | 68.70  | 69.47    | 69.52       | 68.56  |
| N4–Zn1–N4_a                 | <i>cis</i>   | 74.89 <sup>a</sup>  | 77.79  | 81.23  | 81.70    | 77.07       | 76.96  |
| O2–Zn1–N4,<br>O2_a–Zn1–N4_a | <i>cis</i>   | 88.27 <sup>a</sup>  | 88.20  | 87.71  | 87.30    | 87.28       | 85.92  |
| N1–Zn1–N4_a,<br>N4–Zn1–N1_a | <i>cis</i>   | 88.76 <sup>a</sup>  | 89.30  | 89.20  | 88.86    | 88.74       | 92.70  |
| O2–Zn1–N1_a,<br>N1–Zn1–O2_a | <i>cis</i>   | 90.12 <sup>a</sup>  | 84.99  | 85.15  | 84.20    | 84.10       | 86.97  |
| O2–Zn1–N1_a,<br>N1–Zn1–O2_a | <i>cis</i>   | 105.15 <sup>a</sup> | 110.02 | 111.06 | 111.75   | 110.47      | 104.85 |
| O2–Zn1–O2_a                 | <i>cis</i>   | 114.54 <sup>a</sup> | 114.80 | 112.85 | 113.29   | 117.44      | 119.71 |
| N1–Zn1–N1_a                 | <i>trans</i> | 151.80 <sup>a</sup> | 152.60 | 151.23 | 151.63   | 152.50      | 156.63 |
| O2–Zn1–N4_a,<br>N4–Zn1–O2_a | <i>trans</i> | 152.70 <sup>a</sup> | 150.43 | 151.59 | 151.52   | 149.31      | 149.02 |

**Table S5** Selected bond lengths (Å) of optimized complex **2** geometries at different levels of theory compared to crystal structure data as referent values<sup>a</sup>

| Bond               |                     | B3LYP | B3LYP  | B3LYP       | B3LYP           | CAM-B3LYP   |
|--------------------|---------------------|-------|--------|-------------|-----------------|-------------|
| Level of theory    |                     | 6-31G | 6-311G | 6-311G(d,p) | 6-311G, lanl2dz | 6-311G(d,p) |
| Zn(1)–O(1)         | 2.0023 <sup>a</sup> | 2.048 | 2.037  | 2.032       | 2.059           | 2.012       |
| Zn(1)–O(3)         | 2.4600 <sup>a</sup> | 2.748 | 2.578  | 2.330       | 2.401           | 2.411       |
| Zn(1)–O(4)         | 2.0211 <sup>a</sup> | 2.012 | 2.039  | 2.076       | 2.129           | 2.020       |
| Zn(1)–O(5)         | 1.9805 <sup>a</sup> | 1.988 | 1.996  | 1.999       | 2.037           | 1.979       |
| Zn(1)–N(1)         | 2.0813 <sup>a</sup> | 2.067 | 2.063  | 2.103       | 2.141           | 2.075       |
| Zn(1)–N(3)         | 2.3486 <sup>a</sup> | 2.333 | 2.319  | 2.346       | 2.383           | 2.315       |
| Zn(2)–O(2), O(2_a) | 2.1201 <sup>a</sup> | 2.127 | 2.113  | 2.104       | 2.152           | 2.098       |
| Zn(2)–O(4), O(4_a) | 2.0936 <sup>a</sup> | 2.011 | 2.039  | 2.077       | 2.129           | 2.020       |
| Zn(2)–O(6), O(6_a) | 2.0846 <sup>a</sup> | 2.113 | 2.111  | 2.104       | 2.136           | 2.083       |

**Table S6** The calculated natural atomic charges (NACs) and natural electron configurations (NECs) of selected atoms in free molecules/ions and complex **1**

| Atoms                                | Free molecule/ion                                                                                    | Complex <b>1</b> *                                                                                   |
|--------------------------------------|------------------------------------------------------------------------------------------------------|------------------------------------------------------------------------------------------------------|
| NACs                                 |                                                                                                      |                                                                                                      |
| L <sup>1</sup> : N(1) <sub>pm</sub>  | -0.4826                                                                                              | -0.6421                                                                                              |
| L <sup>1</sup> : N(4) <sub>azo</sub> | -0.1445                                                                                              | -0.2181                                                                                              |
| O(2) <sub>NO<sub>3</sub></sub>       | -0.5852                                                                                              | -0.7625                                                                                              |
| Zn(1)                                | /                                                                                                    | +1.6907                                                                                              |
| NECs**                               |                                                                                                      |                                                                                                      |
| L <sup>1</sup> : N(1) <sub>pm</sub>  | [core]2s <sup>1.37</sup> 2p <sup>4.10</sup> 3p <sup>0.01</sup> 3d <sup>0.01</sup>                    | [core]2s <sup>1.35</sup> 2p <sup>4.27</sup> 3p <sup>0.02</sup>                                       |
| L <sup>1</sup> : N(4) <sub>azo</sub> | [core]2s <sup>1.40</sup> 2p <sup>3.72</sup> 3s <sup>0.01</sup> 3p <sup>0.01</sup> 3d <sup>0.01</sup> | [core]2s <sup>1.37</sup> 2p <sup>3.81</sup> 3s <sup>0.01</sup> 3p <sup>0.02</sup> 3d <sup>0.01</sup> |
| O(2) <sub>NO<sub>3</sub></sub>       | [core]2s <sup>1.76</sup> 2p <sup>4.81</sup>                                                          | [core]2s <sup>1.77</sup> 2p <sup>4.98</sup> 3p <sup>0.01</sup>                                       |
| Zn(1)                                | /                                                                                                    | [core]4s <sup>0.33</sup> 3d <sup>9.96</sup> 4p <sup>0.01</sup> 5s <sup>0.01</sup>                    |

\* Half of the data were presented due to symmetry consideration

\*\* [core] represent inner core electrons

**Table S7** The calculated natural atomic charges (NACs) and natural electron configurations (NECs) of selected atoms in free molecules/ions and complex **2**

| Atoms                                | Free molecule/ion                                                                                    | Complex <b>2</b> *                                                                                   |
|--------------------------------------|------------------------------------------------------------------------------------------------------|------------------------------------------------------------------------------------------------------|
| NACs                                 |                                                                                                      |                                                                                                      |
| L <sup>2</sup> : N(1) <sub>py</sub>  | -0.4506                                                                                              | -0.6140                                                                                              |
| L <sup>2</sup> : N(3) <sub>azo</sub> | -0.1461                                                                                              | -0.2156                                                                                              |
| O(3) <sub>ac</sub>                   | -0.7979                                                                                              | -0.7135                                                                                              |
| O(5) <sub>ac</sub>                   | -0.8084                                                                                              | -0.8696                                                                                              |
| O(4) <sub>ac</sub>                   | -0.8084                                                                                              | -0.9814                                                                                              |
| Zn(1)                                | /                                                                                                    | +1.6826                                                                                              |
| O(6) <sub>ac</sub>                   |                                                                                                      | -0.8298                                                                                              |
| O(2) <sub>ac</sub>                   |                                                                                                      | -0.8160                                                                                              |
| Zn(2)                                | /                                                                                                    | +1.7313                                                                                              |
| NECs**                               |                                                                                                      |                                                                                                      |
| L <sup>2</sup> : N(1) <sub>py</sub>  | [core]2s <sup>1.35</sup> 2p <sup>4.08</sup> 3p <sup>0.01</sup> 3d <sup>0.01</sup>                    | [core]2s <sup>1.34</sup> 2p <sup>4.25</sup> 3p <sup>0.02</sup>                                       |
| L <sup>2</sup> : N(3) <sub>azo</sub> | [core]2s <sup>1.39</sup> 2p <sup>3.73</sup> 3s <sup>0.01</sup> 3p <sup>0.01</sup> 3d <sup>0.01</sup> | [core]2s <sup>1.36</sup> 2p <sup>3.81</sup> 3s <sup>0.01</sup> 3p <sup>0.02</sup> 3d <sup>0.01</sup> |
| O(4) <sub>ac</sub>                   | [core]2s <sup>1.71</sup> 2p <sup>5.08</sup>                                                          | [core]2s <sup>1.70</sup> 2p <sup>5.16</sup> 3p <sup>0.01</sup>                                       |
| O(3) <sub>ac</sub>                   | [core]2s <sup>1.71</sup> 2p <sup>5.07</sup>                                                          | [core]2s <sup>1.70</sup> 2p <sup>5.00</sup>                                                          |
| O(5) <sub>ac</sub>                   | [core]2s <sup>1.71</sup> 2p <sup>5.08</sup>                                                          | [core]2s <sup>1.70</sup> 2p <sup>5.16</sup> 3p <sup>0.01</sup>                                       |
| Zn(1)                                | /                                                                                                    | [core]4s <sup>0.33</sup> 3d <sup>9.97</sup> 4p <sup>0.01</sup>                                       |
| Zn(2)                                | /                                                                                                    | [core]4s <sup>0.28</sup> 3d <sup>9.98</sup> 4p <sup>0.01</sup>                                       |

\* Half of the data are presented due to symmetry consideration

\*\* [core] represent inner core electrons

**Table S8** Selected Donor NBO(i) and Acceptor NBO(j) Orbitals in Complexes, Orbital Occupancy (Occ.), Percent of Atomic Orbitals Contribute to NBOs (AO%) and the Second Order Perturbative Energies  $E^2$  (kcal mol<sup>-1</sup>) corresponding to donor-acceptor interactions in complexes

| NBO(i)                    | Donor  |                  | NBO(j)              | Acceptor |                        | $E^2$ |
|---------------------------|--------|------------------|---------------------|----------|------------------------|-------|
|                           | Occ.   | AO%              |                     | Occ.     | AO%                    |       |
| <b>complex 1</b>          |        |                  |                     |          |                        |       |
| LP(2) O(2) <sub>NO3</sub> | 1.9075 | s(24.00)p(75.98) | LP*(6)Zn            | 0.3293   | s(99.85)p(0.01)d(0.13) | 38.67 |
| LP(1) O(2) <sub>NO3</sub> | 1.9665 | s(54.29)p(45.69) | LP*(6)Zn            | 0.3293   | s(99.85)p(0.01)d(0.13) | 9.89  |
| LP(1) N(1) <sub>pm</sub>  | 1.8941 | s(24.33)p(75.65) | LP*(6)Zn            | 0.3293   | s(99.85)p(0.01)d(0.13) | 30.14 |
| LP(1) N(4) <sub>azo</sub> | 1.9277 | s(33.21)p(66.76) | LP*(6)Zn            | 0.3293   | s(99.85)p(0.01)d(0.13) | 17.88 |
| <b>complex 2</b>          |        |                  |                     |          |                        |       |
|                           |        |                  | <u>Zn(1) center</u> |          |                        |       |
| LP(1) N(1) <sub>py</sub>  | 1.8891 | s(23.69)p(76.29) | LP*(6)Zn            | 0.3330   | s(99.90)p(0.07)d(0.03) | 32.83 |
| LP(1) N(3) <sub>azo</sub> | 1.9273 | s(32.68)p(67.29) | LP*(6)Zn            | 0.3330   | s(99.90)p(0.07)d(0.03) | 21.22 |
| LP(1) O(1) <sub>ac</sub>  | 1.9516 | s(48.54)p(51.43) | LP*(6)Zn            | 0.3330   | s(99.90)p(0.07)d(0.03) | 13.10 |
| LP(2) O(4) <sub>ac</sub>  | 1.8911 | s(10.26)p(89.72) | LP*(6)Zn            | 0.3330   | s(99.90)p(0.07)d(0.03) | 30.61 |
| LP(2) O(4) <sub>ac</sub>  | 1.8955 | s(16.33)p(83.65) | LP*(6)Zn            | 0.3330   | s(99.90)p(0.07)d(0.03) | 30.95 |
| LP(1) O(4) <sub>ac</sub>  | 1.9381 | s(44.41)p(55.58) | LP*(6)Zn            | 0.3330   | s(99.90)p(0.07)d(0.03) | 4.63  |
| LP(1) O(3) <sub>ac</sub>  | 1.9684 | s(56.03)p(43.95) | LP*(6)Zn            | 0.3330   | s(99.90)p(0.07)d(0.03) | 4.68  |
| LP(2) O(5) <sub>ac</sub>  | 1.8871 | s(12.37)p(87.61) | LP*(6)Zn            | 0.3330   | s(99.90)p(0.07)d(0.03) | 34.10 |
| LP(1) O(5) <sub>ac</sub>  | 1.9540 | s(46.32)p(53.66) | LP*(6)Zn            | 0.3330   | s(99.90)p(0.07)d(0.03) | 12.51 |
|                           |        |                  | <u>Zn(2) center</u> |          |                        |       |
| LP(1) O(2) <sub>ac</sub>  | 1.9493 | s(53.05)p(46.93) | LP*(6)Zn            | 0.2827   | s(99.99)d(0.01)        | 17.32 |
| LP(2) O(2) <sub>ac</sub>  | 1.8950 | s(4.76)p(95.21)  | LP*(6)Zn            | 0.2827   | s(99.99)d(0.01)        | 16.17 |
| LP(1) O(4) <sub>ac</sub>  | 1.9381 | s(44.41)p(55.58) | LP*(6)Zn            | 0.2827   | s(99.99)d(0.01)        | 23.79 |
| LP(1) O(6) <sub>ac</sub>  | 1.9490 | s(52.38)p(47.60) | LP*(6)Zn            | 0.2827   | s(99.99)d(0.01)        | 17.50 |
| LP(2) O(6) <sub>ac</sub>  | 1.8963 | s(5.17)p(94.81)  | LP*(6)Zn            | 0.2827   | s(99.99)d(0.01)        | 16.45 |

LP(1) and (2) denote the first and second lone electron pair orbital

LP\*(6) denote the sixth-center orbital with an anti-bonding character.



**Table S9** Topological parameters of electron density for free ligand L<sup>1</sup> and its complex **1**: electron density ( $\rho(r)$ ), Laplacian distribution ( $\nabla^2\rho(r)$ ), potential energy density ( $V(r)$ ), kinetic energy density ( $G(r)$ ), and electronic energy density ( $H(r)$ ) at the Bond Critical Points (3, -1). Parameters are all in the atomic unit (a.u) except  $k(r) = |V(r)| / G(r)$ .

| Bond                                     | $\rho(r)$ | $\nabla^2\rho(r)$ | $H(r)$  | $V(r)$  | $G(r)$ | $k(r)$ |
|------------------------------------------|-----------|-------------------|---------|---------|--------|--------|
| free ligand                              |           |                   |         |         |        |        |
| C(1) <sub>pm</sub> -N(1) <sub>pm</sub>   | 0.3536    | -1.0811           | -0.5044 | -0.7384 | 0.2341 | 3.1547 |
| N(1) <sub>pm</sub> -C(2) <sub>pm</sub>   | 0.3472    | -1.0032           | -0.5059 | -0.7609 | 0.2551 | 2.9833 |
| C(2) <sub>pm</sub> -C(3) <sub>pm</sub>   | 0.3173    | -0.9158           | -0.3325 | -0.4361 | 0.1036 | 4.2101 |
| C(3) <sub>pm</sub> -C(4) <sub>pm</sub>   | 0.3173    | -0.9162           | -0.3326 | -0.4361 | 0.1035 | 4.2129 |
| C(4) <sub>pm</sub> -N(2) <sub>pm</sub>   | 0.3479    | -1.0044           | -0.5077 | -0.7643 | 0.2566 | 2.9786 |
| N(2) <sub>pm</sub> -C(1) <sub>pm</sub>   | 0.3537    | -1.0927           | -0.5055 | -0.7377 | 0.2323 | 3.1760 |
| C(1) <sub>pm</sub> -N(3) <sub>azo</sub>  | 0.3046    | -0.9296           | -0.3474 | -0.4624 | 0.1150 | 4.0212 |
| N(3) <sub>azo</sub> -N(4) <sub>azo</sub> | 0.4767    | -1.2475           | -0.6052 | -0.8984 | 0.2933 | 3.0634 |
| N(4) <sub>azo</sub> -C(5) <sub>ph</sub>  | 0.2991    | -0.8885           | -0.3708 | -0.5195 | 0.1487 | 3.4936 |
| complex <b>1</b>                         |           |                   |         |         |        |        |
| Zn(1)-N(1) <sub>pm</sub>                 | 0.0654    | 0.2469            | -0.0134 | -0.0885 | 0.0751 | 1.1781 |
| Zn(1)-N(4) <sub>azo</sub>                | 0.0348    | 0.1170            | -0.0049 | -0.0391 | 0.0342 | 1.1435 |
| Zn(1)-O(2) <sub>NO3</sub>                | 0.0779    | 0.4021            | -0.0091 | -0.1188 | 0.1097 | 1.0834 |
| C(1) <sub>pm</sub> -N(1) <sub>pm</sub>   | 0.3488    | -1.0233           | -0.5032 | -0.7507 | 0.2474 | 3.0339 |
| N(1) <sub>pm</sub> -C(2) <sub>pm</sub>   | 0.3375    | -0.8770           | -0.4963 | -0.7733 | 0.2770 | 2.7915 |
| C(2) <sub>pm</sub> -C(3) <sub>pm</sub>   | 0.3190    | -0.9307           | -0.3360 | -0.4394 | 0.1034 | 4.2505 |
| C(3) <sub>pm</sub> -C(4) <sub>pm</sub>   | 0.3186    | -0.9247           | -0.3350 | -0.4389 | 0.1039 | 4.2255 |
| C(4) <sub>pm</sub> -N(2) <sub>pm</sub>   | 0.3458    | -1.0010           | -0.5038 | -0.7573 | 0.2535 | 2.9872 |
| N(2) <sub>pm</sub> -C(1) <sub>pm</sub>   | 0.3612    | -1.1293           | -0.5217 | -0.7611 | 0.2394 | 3.1794 |
| C(1) <sub>pm</sub> -N(3) <sub>azo</sub>  | 0.3023    | -0.9026           | -0.3405 | -0.4553 | 0.1148 | 3.9652 |
| N(3) <sub>azo</sub> -N(4) <sub>azo</sub> | 0.4736    | -1.2308           | -0.5969 | -0.8861 | 0.2892 | 3.0640 |
| N(4) <sub>azo</sub> -C(5) <sub>ph</sub>  | 0.2964    | -0.8378           | -0.3879 | -0.5664 | 0.1785 | 3.1734 |

**Table S10** Topological parameters of electron density for free ligand L<sup>2</sup> and its complex **2**: electron density ( $\rho(r)$ ), Laplacian distribution ( $\nabla^2\rho(r)$ ), potential energy density ( $V(r)$ ), kinetic energy density ( $G(r)$ ), and electronic energy density ( $H(r)$ ) at the Bond Critical Points (3, -1). Parameters are all in the atomic unit (a.u) except  $k(r) = |V(r)| / G(r)$ .

| Bond                                     | $\rho(r)$ | $\nabla^2\rho(r)$ | $H(r)$  | $V(r)$  | $G(r)$ | $k(r)$ |
|------------------------------------------|-----------|-------------------|---------|---------|--------|--------|
| free ligand                              |           |                   |         |         |        |        |
| C(1) <sub>py</sub> -N(1) <sub>py</sub>   | 0.3502    | -1.0395           | -0.5045 | -0.7491 | 0.2446 | 3.0624 |
| N(1) <sub>py</sub> -C(5) <sub>py</sub>   | 0.3458    | -0.9559           | -0.5074 | -0.7759 | 0.2685 | 2.8901 |
| C(5) <sub>py</sub> -C(4) <sub>py</sub>   | 0.3146    | -0.8999           | -0.3262 | -0.4275 | 0.1012 | 4.2220 |
| C(4) <sub>py</sub> -C(3) <sub>py</sub>   | 0.3136    | -0.8961           | -0.3259 | -0.4279 | 0.1019 | 4.1977 |
| C(3) <sub>py</sub> -C(2) <sub>py</sub>   | 0.3158    | -0.9085           | -0.3306 | -0.4341 | 0.1035 | 4.1949 |
| C(2) <sub>py</sub> -C(1) <sub>py</sub>   | 0.3159    | -0.9091           | -0.3280 | -0.4287 | 0.1007 | 4.2562 |
| C(1) <sub>py</sub> -N(2) <sub>azo</sub>  | 0.2983    | -0.8915           | -0.3432 | -0.4635 | 0.1203 | 3.8522 |
| N(2) <sub>azo</sub> -N(3) <sub>azo</sub> | 0.4765    | -1.2491           | -0.6039 | -0.8956 | 0.2917 | 3.0707 |
| N(3) <sub>azo</sub> -C(6) <sub>ph</sub>  | 0.2995    | -0.8911           | -0.3689 | -0.5149 | 0.1461 | 3.5251 |
| complex <b>2</b>                         |           |                   |         |         |        |        |
| Zn(1) centre                             |           |                   |         |         |        |        |
| Zn(1)-N(1) <sub>py</sub>                 | 0.0725    | 0.2930            | -0.0015 | -0.1027 | 0.0880 | 1.1672 |
| Zn(1)-N(3) <sub>azo</sub>                | 0.0436    | 0.1457            | -0.0078 | -0.0520 | 0.0442 | 1.1763 |
| Zn(1)-O(3) <sub>ac</sub>                 | 0.0304    | 0.1203            | -0.0022 | -0.0345 | 0.0323 | 1.0681 |
| Zn(1)-O(4) <sub>ac</sub>                 | 0.0740    | 0.3603            | -0.0102 | -0.1105 | 0.1003 | 1.1017 |
| Zn(1)-O(5) <sub>ac</sub>                 | 0.0785    | 0.4154            | -0.0092 | -0.1222 | 0.1130 | 1.0810 |
| Zn(1)-O(1) <sub>ac</sub>                 | 0.0727    | 0.3683            | -0.0087 | -0.1094 | 0.1007 | 1.0859 |
| Zn(2) centre                             |           |                   |         |         |        |        |
| Zn(2)-O(6) <sub>ac</sub>                 | 0.0592    | 0.2840            | -0.0068 | -0.0847 | 0.0779 | 1.0879 |
| Zn(2)-O(4) <sub>ac</sub>                 | 0.0597    | 0.2912            | -0.0071 | -0.0871 | 0.0799 | 1.0893 |
| Zn(2)-O(2) <sub>ac</sub>                 | 0.0571    | 0.2704            | -0.0066 | -0.0807 | 0.0742 | 1.0886 |
| Zn(2)-O(2) <sub>ac</sub>                 | 0.0570    | 0.2693            | -0.0066 | -0.0804 | 0.0739 | 1.0888 |
| Zn(2)-O(6) <sub>ac</sub>                 | 0.0590    | 0.2828            | -0.0068 | -0.0844 | 0.0775 | 1.0882 |
| Zn(2)-O(4) <sub>ac</sub>                 | 0.0598    | 0.2920            | -0.0071 | -0.0873 | 0.0801 | 1.0891 |
| L <sup>2</sup>                           |           |                   |         |         |        |        |
| C(1) <sub>py</sub> -N(1) <sub>py</sub>   | 0.3440    | -0.9760           | -0.4988 | -0.7535 | 0.2548 | 2.9577 |
| N(1) <sub>py</sub> -C(5) <sub>py</sub>   | 0.3359    | -0.8367           | -0.4943 | -0.7795 | 0.2852 | 2.7336 |
| C(5) <sub>py</sub> -C(4) <sub>py</sub>   | 0.3166    | -0.9148           | -0.3305 | -0.4323 | 0.1018 | 4.2460 |
| C(4) <sub>py</sub> -C(3) <sub>py</sub>   | 0.3143    | -0.9015           | -0.3273 | -0.4291 | 0.1019 | 4.2124 |
| C(3) <sub>py</sub> -C(2) <sub>py</sub>   | 0.3158    | -0.9101           | -0.3303 | -0.4331 | 0.1028 | 4.2136 |
| C(2) <sub>py</sub> -C(1) <sub>py</sub>   | 0.3192    | -0.9314           | -0.3359 | -0.4390 | 0.1031 | 4.2588 |
| C(1) <sub>py</sub> -N(2) <sub>azo</sub>  | 0.3042    | -0.9171           | -0.3539 | -0.4786 | 0.1247 | 3.8392 |
| N(2) <sub>azo</sub> -N(3) <sub>azo</sub> | 0.4697    | -1.2062           | -0.5866 | -0.8717 | 0.2851 | 3.0578 |
| N(3) <sub>azo</sub> -C(6) <sub>ph</sub>  | 0.2966    | -0.8260           | -0.3912 | -0.5758 | 0.1847 | 3.1181 |

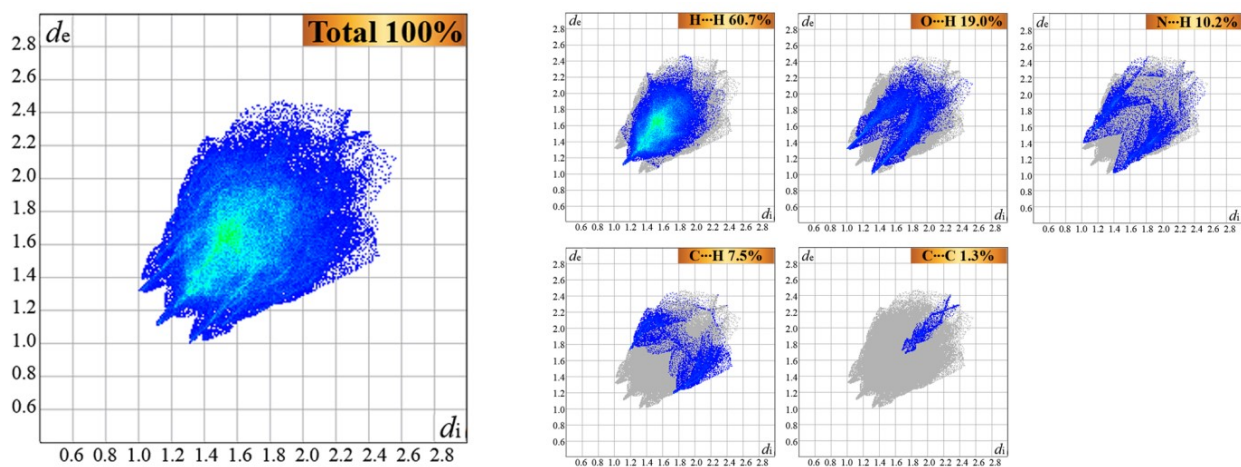

Fig. S3 2D fingerprint plots according to the  $d_{\text{norm}}$  value for 1.

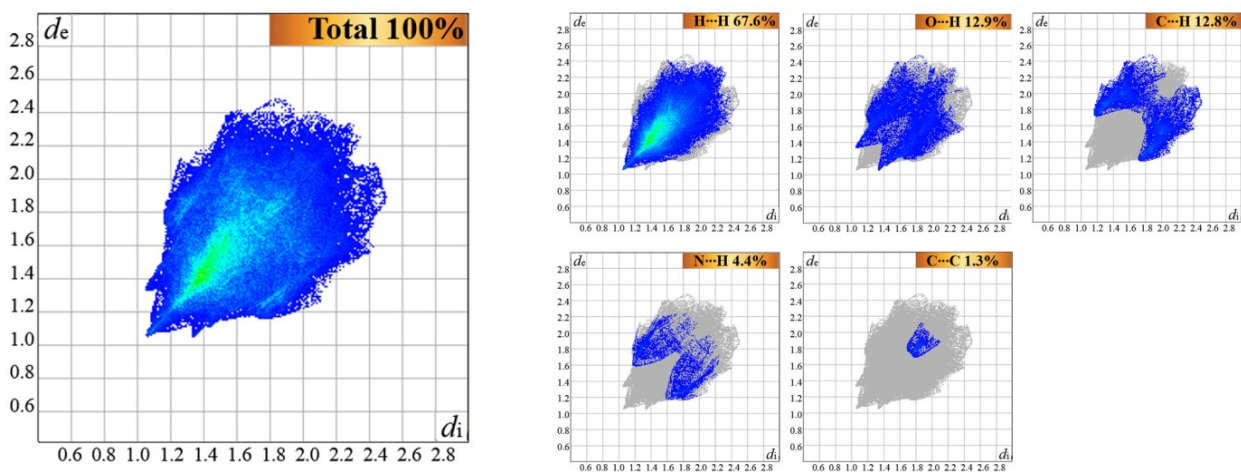

Fig. S4 2D fingerprint plots according to the  $d_{\text{norm}}$  value for 2.

**Table S11** Energy decomposition analysis based on molecular forcefield (EDA-FF) for complex **1**. All energy is given in kcal mol<sup>-1</sup>.  $\Delta E$  is calculated at CAM-B3LYP-GD3BJ/6-311G(d,p) level of theory

| Dimer | R, Å  | Electrostatic | Repulsion | Dispersion | $E_{Total}$ | $\Delta E$ |
|-------|-------|---------------|-----------|------------|-------------|------------|
| D1_1  | 9.39  | -10.63        | 12.85     | -29.60     | -27.38      | -26.37     |
| D2_1  | 19.99 | 0.54          | 6.99      | -23.33     | -15.80      | -14.77     |
| D3_1  | 24.64 | -3.52         | 4.75      | -15.96     | -14.73      | -12.31     |
| D4_1  | 10.65 | -4.99         | 4.78      | -7.01      | -7.22       | -8.64      |
| D5_1  | 27.24 | -0.39         | 1.87      | -9.55      | -8.07       | -6.45      |
| D6_1  | 19.44 | -2.56         | 1.89      | -5.02      | -5.69       | -5.37      |

**Table S12** Energy decomposition analysis based on molecular forcefield (EDA-FF) for complex **2**. All energy is given in kcal mol<sup>-1</sup>.  $\Delta E$  is calculated at CAM-B3LYP-GD3BJ/6-311G(d,p) level of theory

| Dimer | R, Å  | Electrostatic | Repulsion | Dispersion | $E_{Total}$ | $\Delta E$ |
|-------|-------|---------------|-----------|------------|-------------|------------|
| D1_2  | 9.81  | -9.86         | 27.57     | -73.08     | -55.37      | -49.00     |
| D2_2  | 13.98 | -16.38        | 11.05     | -17.47     | -22.80      | -20.61     |
| D3_2  | 24.11 | -2.70         | 7.83      | -20.12     | -14.99      | -12.81     |
| D4_2  | 10.53 | 1.77          | 6.31      | -16.57     | -8.48       | -9.28      |
| D5_2  | 20.39 | 0.01          | 6.42      | -14.00     | -7.58       | -8.52      |
| D6_2  | 26.50 | -0.03         | 2.32      | -8.81      | -6.52       | -6.00      |
| D7_2  | 17.51 | 0.00          | 3.62      | -9.83      | -6.22       | -5.98      |

**Table S13** QTAIM analysis of non-covalent interaction in dimer D1\_1 of complex **1**

| CPs | $\rho(r)$ | $\nabla^2\rho(r)$ | $H(r)$   | $V(r)$    | $G(r)$   | $k(r)$ | $sign(\lambda_2)\rho^*$ | interaction              | $E$   |
|-----|-----------|-------------------|----------|-----------|----------|--------|-------------------------|--------------------------|-------|
| 1   | 0.007100  | 0.021530          | 0.000481 | -0.004421 | 0.004902 | 0.9019 | -0.7099                 | O4...H11 <sup>i</sup>    | -1.39 |
| 2   | 0.012177  | 0.044326          | 0.001617 | -0.007847 | 0.009464 | 0.8291 | -1.2177                 | O4...H4 <sup>i</sup>     | -2.46 |
| 3   | 0.007466  | 0.021083          | 0.000770 | -0.003731 | 0.004501 | 0.8289 | -0.7466                 | N3 <sup>i</sup> ...H3    | -1.17 |
| 4   | 0.010980  | 0.036439          | 0.001495 | -0.006120 | 0.007615 | 0.8037 | -0.0109                 | N2 <sup>i</sup> ...H2    | -1.92 |
| 5   | 0.005038  | 0.015019          | 0.000779 | -0.002196 | 0.002975 | 0.7380 | -0.5038                 | Cg1...Cg2                | -0.69 |
| 6   | 0.003522  | 0.010034          | 0.000390 | -0.001728 | 0.002118 | 0.8157 | -0.3522                 | H17A...H22B <sup>i</sup> | -0.54 |
| 7   | 0.006358  | 0.016104          | 0.000451 | -0.003124 | 0.003575 | 0.8738 | -0.6358                 | H15B...H22B <sup>i</sup> | -0.98 |
| 8   | 0.002937  | 0.008591          | 0.000377 | -0.001393 | 0.001771 | 0.7870 | -0.2937                 | H15B...H20B <sup>i</sup> | -0.44 |
| 9   | 0.004509  | 0.011393          | 0.000322 | -0.002205 | 0.002526 | 0.8726 | -0.4509                 | H13A...H20B <sup>i</sup> | -0.69 |
| 10  | 0.002333  | 0.007028          | 0.000359 | -0.001039 | 0.001398 | 0.7434 | -0.2333                 | H13A...H18B <sup>i</sup> | -0.33 |
| 11  | 0.003634  | 0.009616          | 0.000328 | -0.001747 | 0.002075 | 0.8417 | -0.3634                 | H11B...H18B <sup>i</sup> | -0.55 |
| 12  | 0.002076  | 0.006516          | 0.000000 | -0.000907 | 0.001268 | 0.7151 | -0.2076                 | H11B...H16A <sup>i</sup> | -0.28 |
| 13  | 0.002713  | 0.007290          | 0.000344 | -0.001134 | 0.001478 | 0.7672 | -0.2713                 | Cg1...H16A <sup>i</sup>  | -0.36 |
| 14  | 0.004593  | 0.012114          | 0.000465 | -0.002098 | 0.002563 | 0.8185 | -0.4593                 | Cg1...H14B <sup>i</sup>  | -0.66 |

\*Values of  $sign(\lambda_2)\rho$  are multiple by 10<sup>-2</sup>; Half of the data were presented due to symmetry consideration

**Table S14** QTAIM analysis of non-covalent interaction in dimer D2\_1 of complex 1

| CPs | $\rho(r)$ | $\nabla^2\rho(r)$ | $H(r)$   | $V(r)$    | $G(r)$   | $k(r)$ | $sign(\lambda_2)\rho^*$ | interaction               | $E$   |
|-----|-----------|-------------------|----------|-----------|----------|--------|-------------------------|---------------------------|-------|
| 1   | 0.006723  | 0.018535          | 0.000570 | -0.003494 | 0.004064 | 0.8598 | -0.6723                 | N2 <sup>ii</sup> ...H22C  | -1.10 |
| 2   | 0.002005  | 0.007187          | 0.000360 | -0.001077 | 0.001437 | 0.7496 | -0.2005                 | N3 <sup>ii</sup> ...H20A  | -0.34 |
| 3   | 0.003122  | 0.008957          | 0.000410 | -0.001420 | 0.001830 | 0.7762 | -0.3122                 | Cg1 <sup>ii</sup> ...H20A | -0.45 |
| 4   | 0.003529  | 0.010210          | 0.000459 | -0.001634 | 0.002093 | 0.7805 | -0.3529                 | Cg1 <sup>ii</sup> ...H19A | -0.51 |
| 5   | 0.004397  | 0.011793          | 0.000456 | -0.002037 | 0.002493 | 0.8172 | -0.4397                 | Cg1 <sup>ii</sup> ...H18A | -0.64 |
| 6   | 0.002337  | 0.007929          | 0.000438 | -0.001107 | 0.001545 | 0.7167 | -0.2337                 | Cg1 <sup>ii</sup> ...H17A | -0.35 |
| 7   | 0.002891  | 0.009273          | 0.000413 | -0.001492 | 0.001905 | 0.7830 | -0.2891                 | H16B...H11B <sup>ii</sup> | -0.47 |
| 8   | 0.003443  | 0.010351          | 0.000404 | -0.001779 | 0.002184 | 0.8149 | -0.3443                 | H15B...H12A <sup>ii</sup> | -0.56 |
| 9   | 0.003298  | 0.010590          | 0.000448 | -0.001752 | 0.002200 | 0.7965 | -0.3298                 | H14A...H12A <sup>ii</sup> | -0.55 |
| 10  | 0.002780  | 0.008821          | 0.000395 | -0.001415 | 0.001810 | 0.7818 | -0.2780                 | H14...H13 <sup>ii</sup>   | -0.44 |

\*Values of  $sign(\lambda_2)\rho$  are multiple by  $10^{-2}$ ; Half of the data were presented due to symmetry consideration

**Table S15** QTAIM analysis of non-covalent interaction in dimer D3\_1 of complex 1

| CPs | $\rho(r)$ | $\nabla^2\rho(r)$ | $H(r)$   | $V(r)$    | $G(r)$   | $k(r)$ | $sign(\lambda_2)\rho^*$ | interaction                | $E$   |
|-----|-----------|-------------------|----------|-----------|----------|--------|-------------------------|----------------------------|-------|
| 1   | 0.005411  | 0.016618          | 0.000532 | -0.003090 | 0.003622 | 0.8530 | -0.5411                 | O2 <sup>iii</sup> ...H22A  | -0.97 |
| 2   | 0.005708  | 0.017309          | 0.000703 | -0.002922 | 0.003625 | 0.8062 | -0.5708                 | H21A...H9 <sup>iii</sup>   | -0.92 |
| 3   | 0.001012  | 0.003576          | 0.000256 | -0.000382 | 0.000638 | 0.5982 | -0.1012                 | H19B...H11B <sup>iii</sup> | -0.12 |
| 4   | 0.001237  | 0.004212          | 0.000284 | -0.000485 | 0.000769 | 0.6304 | -0.1237                 | H17B...HA <sup>iii</sup>   | -0.15 |
| 5   | 0.001256  | 0.004272          | 0.000285 | -0.000497 | 0.000783 | 0.6353 | -0.1256                 | H15A...HA <sup>iii</sup>   | -0.16 |

\*Values of  $sign(\lambda_2)\rho$  are multiple by  $10^{-2}$ ; Half of the data were presented due to symmetry consideration

**Table S16** QTAIM analysis of non-covalent interaction in dimer D4\_1 of complex 1

| CPs | $\rho(r)$ | $\nabla^2\rho(r)$ | $H(r)$   | $V(r)$    | $G(r)$   | $k(r)$ | $sign(\lambda_2)\rho^*$ | interaction            | $E$   |
|-----|-----------|-------------------|----------|-----------|----------|--------|-------------------------|------------------------|-------|
| 1   | 0.011046  | 0.038090          | 0.001386 | -0.006750 | 0.008136 | 0.8296 | -1.1046                 | O3 <sup>iv</sup> ...H7 | -2.12 |

\*Values of  $sign(\lambda_2)\rho$  are multiple by  $10^{-2}$ ; Half of the data were presented due to symmetry consideration

**Table S17** QTAIM analysis of non-covalent interaction in dimer D5\_1 of complex 1

| CPs | $\rho(r)$ | $\nabla^2\rho(r)$ | $H(r)$   | $V(r)$    | $G(r)$   | $k(r)$ | $sign(\lambda_2)\rho^*$ | interaction              | $E$   |
|-----|-----------|-------------------|----------|-----------|----------|--------|-------------------------|--------------------------|-------|
| 1   | 0.002380  | 0.009215          | 0.000509 | -0.001286 | 0.001795 | 0.7165 | -0.2380                 | O1 <sup>v</sup> ...H22C  | -0.41 |
| 2   | 0.002143  | 0.007340          | 0.000439 | -0.000957 | 0.001396 | 0.6855 | -0.2143                 | H22C...H12B <sup>v</sup> | -0.30 |
| 3   | 0.002337  | 0.007904          | 0.000460 | -0.001056 | 0.001516 | 0.6967 | -0.2337                 | H20B...H12 <sup>v</sup>  | -0.33 |
| 4   | 0.001926  | 0.006502          | 0.000388 | -0.000850 | 0.001238 | 0.6867 | -0.1926                 | H20B...H14B <sup>v</sup> | -0.27 |
| 5   | 0.001792  | 0.006081          | 0.000371 | -0.000778 | 0.001149 | 0.6768 | -0.1792                 | H18B...H16A <sup>v</sup> | -0.24 |

\*Values of  $sign(\lambda_2)\rho$  are multiple by  $10^{-2}$ ; Half of the data were presented due to symmetry consideration

**Table S18** QTAIM analysis of non-covalent interaction in dimer D6\_1 of complex 1

| CPs | $\rho(r)$ | $\nabla^2\rho(r)$ | $H(r)$   | $V(r)$    | $G(r)$   | $k(r)$ | $sign(\lambda_2)\rho^*$ | interaction              | $E$   |
|-----|-----------|-------------------|----------|-----------|----------|--------|-------------------------|--------------------------|-------|
| 1   | 0.006858  | 0.022006          | 0.000703 | -0.004095 | 0.004798 | 0.8534 | -0.6858                 | O3 <sup>vi</sup> ...H19A | -1.28 |

\*Values of  $sign(\lambda_2)\rho$  are multiple by  $10^{-2}$ ; Half of the data were presented due to symmetry consideration

**Table S19** QTAIM analysis of non-covalent interaction in dimer D1\_2 of complex 2

| CPs | $\rho(r)$ | $\nabla^2\rho(r)$ | $H(r)$   | $V(r)$    | $G(r)$   | $k(r)$ | $sign(\lambda_2)\rho^*$ | interaction                           | $E$   |
|-----|-----------|-------------------|----------|-----------|----------|--------|-------------------------|---------------------------------------|-------|
| 1   | 0.002339  | 0.007204          | 0.000355 | -0.001090 | 0.001446 | 0.7541 | -0.2340                 | H23C...H17A <sup>i</sup>              | -0.34 |
| 2   | 0.002231  | 0.007672          | 0.000396 | -0.001127 | 0.001522 | 0.7402 | -0.2231                 | H22C...H15A <sup>i</sup>              | -0.35 |
| 3   | 0.002988  | 0.009242          | 0.000390 | -0.001531 | 0.001921 | 0.7969 | -0.2988                 | H22B...H16A <sup>i</sup>              | -0.48 |
| 4   | 0.003632  | 0.010757          | 0.000402 | -0.001885 | 0.002287 | 0.8241 | -0.3632                 | H22B...H14A <sup>i</sup>              | -0.59 |
| 5   | 0.002947  | 0.010411          | 0.000496 | -0.001611 | 0.002107 | 0.7648 | -0.2947                 | H22B...H15A <sup>i</sup>              | -0.51 |
| 6   | 0.003353  | 0.010003          | 0.000391 | -0.001719 | 0.002110 | 0.8147 | -0.3353                 | H21B...H15A <sup>i</sup>              | -0.54 |
| 7   | 0.003557  | 0.010825          | 0.000423 | -0.001860 | 0.002283 | 0.8148 | -0.3557                 | H21B...H13B <sup>i</sup>              | -0.58 |
| 8   | 0.004431  | 0.012618          | 0.000419 | -0.002317 | 0.002736 | 0.8470 | -0.4431                 | H20A...H14A <sup>i</sup>              | -0.73 |
| 9   | 0.003558  | 0.012963          | 0.000601 | -0.002038 | 0.002639 | 0.7722 | -0.3558                 | H20A...H13B <sup>i</sup>              | -0.64 |
| 10  | 0.005033  | 0.014587          | 0.000489 | -0.002670 | 0.003158 | 0.8453 | -0.5033                 | H20A...H12A <sup>i</sup>              | -0.84 |
| 11  | 0.004090  | 0.012232          | 0.000446 | -0.002166 | 0.002612 | 0.8292 | -0.4090                 | H19A...H13B <sup>i</sup>              | -0.68 |
| 12  | 0.004950  | 0.013946          | 0.000431 | -0.002626 | 0.003056 | 0.8591 | -0.4950                 | H18B...H12A <sup>i</sup>              | -0.82 |
| 13  | 0.003220  | 0.011947          | 0.000515 | -0.001958 | 0.002472 | 0.7919 | -0.3212                 | O7 <sup>i</sup> ...H19A               | -0.61 |
| 14  | 0.006117  | 0.017832          | 0.000458 | -0.003542 | 0.004000 | 0.8856 | -0.6117                 | O5 <sup>i</sup> ...H14B               | -1.11 |
| 15  | 0.006143  | 0.019799          | 0.000635 | -0.003680 | 0.004315 | 0.8529 | -0.6143                 | O5 <sup>i</sup> ...H25B <sup>ii</sup> | -1.15 |
| 16  | 0.004006  | 0.010622          | 0.000403 | -0.001850 | 0.002253 | 0.8212 | -0.4006                 | Cg2 <sup>i</sup> ...H18B              | -0.58 |
| 17  | 0.004928  | 0.012660          | 0.000457 | -0.002251 | 0.002708 | 0.8312 | -0.4928                 | Cg2 <sup>i</sup> ...H17B              | -0.71 |
| 18  | 0.005399  | 0.014307          | 0.000497 | -0.002583 | 0.003080 | 0.8386 | -0.5399                 | Cg2 <sup>i</sup> ...H16B              | -0.81 |
| 19  | 0.004552  | 0.012346          | 0.000486 | -0.002115 | 0.002601 | 0.8132 | -0.4552                 | Cg2 <sup>i</sup> ...H15B              | -0.66 |
| 20  | 0.004075  | 0.009773          | 0.000391 | -0.001661 | 0.002052 | 0.8093 | -0.4075                 | Cg1 <sup>i</sup> ...Cg2 <sup>i</sup>  | -0.52 |

\*Values of  $sign(\lambda_2)\rho$  are multiple by  $10^{-2}$ ; Half of the data were presented due to symmetry consideration

**Table S20** QTAIM analysis of non-covalent interaction in dimer D2\_2 of complex 2

| CPs | $\rho(r)$ | $\nabla^2\rho(r)$ | $H(r)$   | $V(r)$    | $G(r)$   | $k(r)$ | $sign(\lambda_2)\rho^*$ | interaction              | $E$   |
|-----|-----------|-------------------|----------|-----------|----------|--------|-------------------------|--------------------------|-------|
| 1   | 0.011341  | 0.043978          | 0.001769 | -0.007456 | 0.009225 | 0.8082 | -1.1341                 | O3 <sup>iii</sup> ...H4  | -2.34 |
| 2   | 0.007811  | 0.028860          | 0.001085 | -0.005046 | 0.006130 | 0.8231 | -0.7811                 | O3 <sup>iii</sup> ...H3  | -1.58 |
| 3   | 0.002611  | 0.010593          | 0.000610 | -0.001428 | 0.002038 | 0.7007 | -0.2611                 | Cg1...Cg3 <sup>iii</sup> | -0.45 |
| 4   | 0.005306  | 0.015158          | 0.000701 | -0.002388 | 0.003089 | 0.7731 | -0.5306                 | Cg1...Cg1                | -0.75 |
| 5   | 0.005304  | 0.015150          | 0.000700 | -0.002387 | 0.003087 | 0.7732 | -0.5304                 | Cg1...Cg1                | -0.75 |

\*Values of  $sign(\lambda_2)\rho$  are multiple by  $10^{-2}$ ; Half of the data were presented due to symmetry consideration

**Table S21** QTAIM analysis of non-covalent interaction in dimer D3\_2 of complex 2

| CPs | $\rho(r)$ | $\nabla^2\rho(r)$ | $H(r)$   | $V(r)$    | $G(r)$   | $k(r)$ | $sign(\lambda_2)\rho^*$ | interaction               | $E$   |
|-----|-----------|-------------------|----------|-----------|----------|--------|-------------------------|---------------------------|-------|
| 1   | 0.004923  | 0.016326          | 0.000566 | -0.002950 | 0.003516 | 0.8391 | -0.4924                 | O6 <sup>iv</sup> ...H23B  | -0.93 |
| 2   | 0.000739  | 0.002886          | 0.000229 | -0.000264 | 0.000493 | 0.5355 | -0.0740                 | O3 <sup>v</sup> ...H23A   | -0.08 |
| 3   | 0.005999  | 0.018606          | 0.000773 | -0.003106 | 0.003879 | 0.8008 | -0.5999                 | H23B...H29A <sup>iv</sup> | -0.97 |
| 4   | 0.005378  | 0.017729          | 0.000759 | -0.002915 | 0.003674 | 0.7935 | -0.5378                 | H23A...H25C <sup>v</sup>  | -0.91 |
| 5   | 0.006301  | 0.018545          | 0.000660 | -0.003317 | 0.003977 | 0.8341 | -0.6301                 | H22A...H25C <sup>v</sup>  | -1.04 |
| 6   | 0.002373  | 0.007741          | 0.000406 | -0.001124 | 0.001529 | 0.7346 | -0.2373                 | H22A...H10A <sup>iv</sup> | -0.35 |
| 7   | 0.003721  | 0.009804          | 0.000328 | -0.001796 | 0.002124 | 0.8458 | -0.3721                 | H22A...H12A <sup>iv</sup> | -0.56 |
| 8   | 0.003186  | 0.008571          | 0.000320 | -0.001503 | 0.001823 | 0.8244 | -0.3186                 | H20B...H14A <sup>iv</sup> | -0.47 |
| 9   | 0.002796  | 0.007793          | 0.000327 | -0.001295 | 0.001621 | 0.7984 | -0.2796                 | H18A...H16A <sup>iv</sup> | -0.41 |
| 10  | 0.001500  | 0.004924          | 0.000318 | -0.000594 | 0.000913 | 0.6512 | -0.1500                 | H16A...H16A <sup>iv</sup> | -0.19 |

\*Values of  $sign(\lambda_2)\rho$  are multiple by  $10^{-2}$ ; Half of the data were presented due to symmetry consideration

**Table S22** QTAIM analysis of non-covalent interaction in dimer D4\_2 of complex 2

| CPs | $\rho(r)$ | $\nabla^2\rho(r)$ | $H(r)$   | $V(r)$    | $G(r)$   | $k(r)$ | $sign(\lambda_2)\rho^*$ | interaction                | $E$   |
|-----|-----------|-------------------|----------|-----------|----------|--------|-------------------------|----------------------------|-------|
| 1   | 0.005262  | 0.017401          | 0.000764 | -0.002823 | 0.003586 | 0.7871 | -0.5262                 | N2 <sup>vii</sup> ...H27A  | -0.89 |
| 2   | 0.004922  | 0.015563          | 0.000727 | -0.002438 | 0.003164 | 0.7704 | -0.4922                 | Cg2 <sup>vii</sup> ...H27C | -0.76 |
| 3   | 0.008249  | 0.025575          | 0.000782 | -0.004829 | 0.005611 | 0.8606 | -0.8249                 | O3 <sup>vii</sup> ...H27A  | -1.52 |

\*Values of  $sign(\lambda_2)\rho$  are multiple by  $10^{-2}$ ; Half of the data were presented due to symmetry consideration

**Table S23** QTAIM analysis of non-covalent interaction in dimer D5\_2 of complex 2

| CPs | $\rho(r)$ | $\nabla^2\rho(r)$ | $H(r)$   | $V(r)$    | $G(r)$   | $k(r)$ | $sign(\lambda_2)\rho^*$ | interaction              | $E$   |
|-----|-----------|-------------------|----------|-----------|----------|--------|-------------------------|--------------------------|-------|
| 1   | 0.001461  | 0.004922          | 0.000309 | -0.000612 | 0.000922 | 0.6646 | -0.1461                 | H13...H13B <sup>vi</sup> | -0.19 |
| 2   | 0.007652  | 0.021456          | 0.000777 | -0.003809 | 0.004587 | 0.8305 | -0.7652                 | H21A...H2 <sup>vi</sup>  | -1.20 |
| 3   | 0.004526  | 0.013694          | 0.000543 | -0.002338 | 0.002881 | 0.8117 | -0.4526                 | H17A...H7 <sup>vi</sup>  | -0.73 |
| 4   | 0.003685  | 0.012229          | 0.000567 | -0.001923 | 0.002490 | 0.7723 | -0.3685                 | H17A...H8 <sup>vi</sup>  | -0.60 |
| 5   | 0.007906  | 0.021140          | 0.000722 | -0.003840 | 0.004563 | 0.8417 | -0.7906                 | H15A...H8 <sup>vi</sup>  | -1.20 |
| 6   | 0.002288  | 0.007192          | 0.000369 | -0.001059 | 0.001429 | 0.7415 | -0.2288                 | H23A...H3 <sup>vi</sup>  | -0.33 |

\*Values of  $sign(\lambda_2)\rho$  are multiple by  $10^{-2}$ ; Half of the data were presented due to symmetry consideration

**Table S24** QTAIM analysis of non-covalent interaction in dimer D6\_2 of complex 2

| CPs | $\rho(r)$ | $\nabla^2\rho(r)$ | $H(r)$   | $V(r)$        | $G(r)$   | $k(r)$ | $sign(\lambda_2)\rho^*$ | interaction                     | $E$   |
|-----|-----------|-------------------|----------|---------------|----------|--------|-------------------------|---------------------------------|-------|
| 1   | 0.005752  | 0.018175          | 0.000779 | -0.00298<br>6 | 0.003765 | 0.7931 | -0.5752                 | H29C...H19B <sup>viii</sup>     | -0.94 |
| 2   | 0.004422  | 0.013302          | 0.000528 | -0.00227<br>0 | 0.002798 | 0.8114 | -0.4422                 | H29B...H20B <sup>viii</sup>     | -0.71 |
| 3   | 0.004272  | 0.013477          | 0.000585 | -0.00219<br>9 | 0.002784 | 0.7899 | -0.4272                 | H29B...H18A <sup>vii</sup><br>i | -0.69 |
| 4   | 0.002267  | 0.007645          | 0.000400 | -0.00111<br>1 | 0.001511 | 0.7353 | -0.2267                 | H29A...H17 <sup>viii</sup>      | -0.35 |

\*Values of  $sign(\lambda_2)\rho$  are multiple by  $10^{-2}$ ; Half of the data were presented due to symmetry consideration

**Table S25** QTAIM analysis of non-covalent interaction in dimer D7\_2 of complex 2

| CPs | $\rho(r)$ | $\nabla^2\rho(r)$ | $H(r)$   | $V(r)$    | $G(r)$   | $k(r)$ | $sign(\lambda_2)\rho^*$ | interaction               | $E$   |
|-----|-----------|-------------------|----------|-----------|----------|--------|-------------------------|---------------------------|-------|
| 1   | 0.006117  | 0.017273          | 0.000644 | -0.003031 | 0.003675 | 0.8248 | -0.6116                 | H23C...H8 <sup>ix</sup>   | -0.95 |
| 2   | 0.001706  | 0.006695          | 0.000426 | -0.000821 | 0.001248 | 0.6583 | -0.1706                 | O7 <sup>ix</sup> ...H21B  | -0.26 |
| 3   | 0.003132  | 0.009208          | 0.000401 | -0.001500 | 0.001901 | 0.7889 | -0.3132                 | H19A...H13A <sup>ix</sup> | -0.47 |
| 4   | 0.002752  | 0.008088          | 0.000370 | -0.001283 | 0.001652 | 0.7762 | -0.2752                 | H17B...H15B <sup>ix</sup> | -0.40 |

\*Values of  $sign(\lambda_2)\rho$  are multiple by  $10^{-2}$ ; Half of the data were presented due to symmetry consideration
